# Supplementary material
Source: Springer Nature journal article supplement (https://www.springermedizin.de/resource/supplementary/12936_2005_198_MOESM2_ESM.pdf/9547156)

Haemoglobin concentration  
in Gm/dl

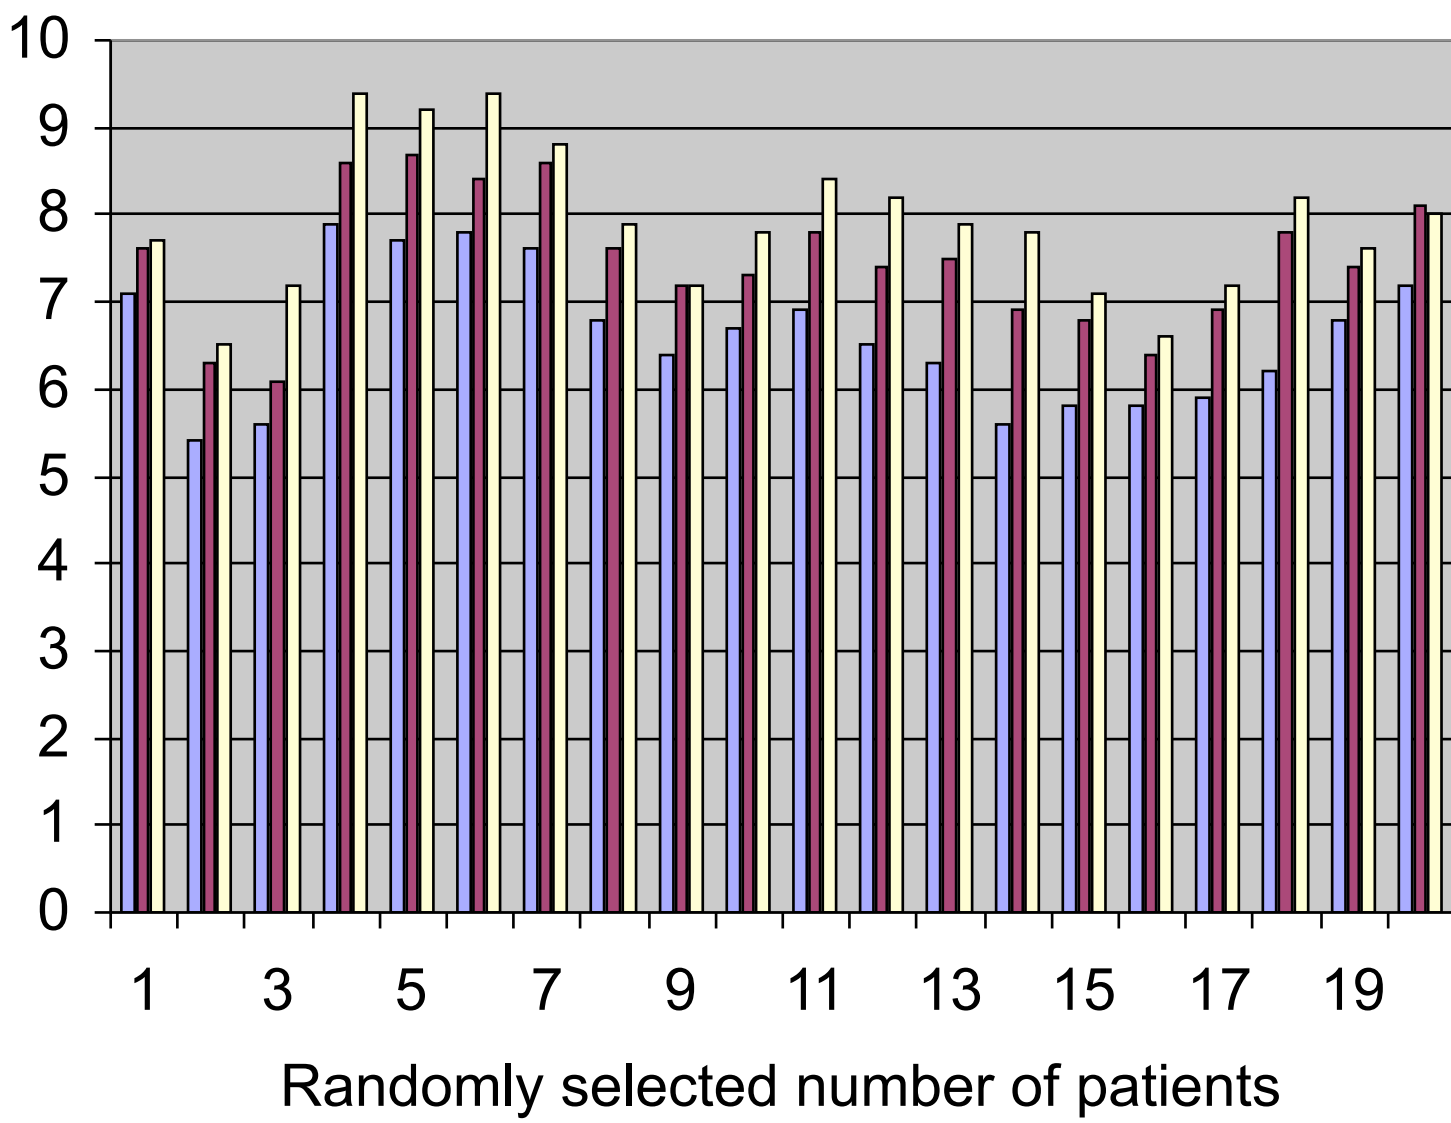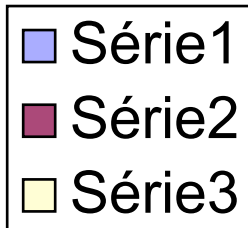

Supplement: MOESM2 [file 9547156]
